# Supplementary material for: Stable copernicium hexafluoride (CnF6) with an oxidation state of VI+
Source: Royal Society of Chemistry journal article supplement (doi:10.1039/d1cp04360a), 2021-11-30
Supplement: d1cp04360a1.pdf [file d1cp04360a1.pdf]

Electronic Supplementary Information

**Stable copernicium hexafluoride (CnF<sub>6</sub>) with an oxidation state of +VI**

|                                                                 |    |
|-----------------------------------------------------------------|----|
| Computational details.....                                      | 2  |
| Basis functions of Cn used in the X2C-AU/PBE0 calculations..... | 2  |
| Active spinors (orbitals) in coupled-cluster calculations.....  | 4  |
| The complete basis set (CBS) limit .....                        | 4  |
| LOBA.....                                                       | 5  |
| Optimized Cartesian coordinates .....                           | 6  |
| SOECP/PBE0.....                                                 | 6  |
| X2C-AU/PBE0 .....                                               | 7  |
| SOECP/CCSD(T) .....                                             | 8  |
| Harmonic vibrational frequencies at the X2C-AU/PBE0 level.....  | 10 |
| Effective contact densities of Cn in fluorides .....            | 11 |



3. 1140912E+06 0. 1500978605E+00 0 0 0 0 0 0 0 0 0 0 0 0 0 0 0 0 0 0 0 0  
 1. 2178111E+06 0. 3067590648E+00 0 0 0 0 0 0 0 0 0 0 0 0 0 0 0 0 0 0 0 0  
 4. 9112174E+05 0. 6190988080E+00 0 0 0 0 0 0 0 0 0 0 0 0 0 0 0 0 0 0 0 0  
 2. 0348068E+05 0 1 0 0 0 0 0 0 0 0 0 0 0 0 0 0 0 0 0 0  
 8. 6451661E+04 0 0 1 0 0 0 0 0 0 0 0 0 0 0 0 0 0 0 0 0  
 3. 7643347E+04 0 0 0 1 0 0 0 0 0 0 0 0 0 0 0 0 0 0 0 0  
 1. 6815031E+04 0 0 0 0 1 0 0 0 0 0 0 0 0 0 0 0 0 0 0 0  
 7. 7222422E+03 0 0 0 0 0 1 0 0 0 0 0 0 0 0 0 0 0 0 0 0  
 3. 6551368E+03 0 0 0 0 0 0 1 0 0 0 0 0 0 0 0 0 0 0 0 0  
 1. 7844639E+03 0 0 0 0 0 0 0 1 0 0 0 0 0 0 0 0 0 0 0 0  
 8. 9728354E+02 0 0 0 0 0 0 0 0 1 0 0 0 0 0 0 0 0 0 0 0  
 4. 6359849E+02 0 0 0 0 0 0 0 0 0 1 0 0 0 0 0 0 0 0 0 0  
 2. 4563037E+02 0 0 0 0 0 0 0 0 0 0 1 0 0 0 0 0 0 0 0 0  
 1. 3354890E+02 0 0 0 0 0 0 0 0 0 0 0 1 0 0 0 0 0 0 0 0  
 7. 4458648E+01 0 0 0 0 0 0 0 0 0 0 0 0 1 0 0 0 0 0 0 0  
 4. 1627403E+01 0 0 0 0 0 0 0 0 0 0 0 0 0 1 0 0 0 0 0 0  
 2. 3594039E+01 0 0 0 0 0 0 0 0 0 0 0 0 0 0 1 0 0 0 0 0  
 1. 3462937E+01 0 0 0 0 0 0 0 0 0 0 0 0 0 0 0 1 0 0 0 0  
 7. 4766155E+00 0 0 0 0 0 0 0 0 0 0 0 0 0 0 0 0 1 0 0 0  
 4. 0745243E+00 0 0 0 0 0 0 0 0 0 0 0 0 0 0 0 0 0 1 0 0  
 2. 1223256E+00 0 0 0 0 0 0 0 0 0 0 0 0 0 0 0 0 0 0 1 0  
 1. 0779145E+00 0 0 0 0 0 0 0 0 0 0 0 0 0 0 0 0 0 0 0 1  
 5. 0638096E-01 0 0 0 0 0 0 0 0 0 0 0 0 0 0 0 0 0 0 0 0 1  
 1. 9532125E-01 0 0 0 0 0 0 0 0 0 0 0 0 0 0 0 0 0 0 0 0 0 1  
 7. 3226404E-02 0 0 0 0 0 0 0 0 0 0 0 0 0 0 0 0 0 0 0 0 0 0 1  
 2. 6615576E-02 0 0 0 0 0 0 0 0 0 0 0 0 0 0 0 0 0 0 0 0 0 0 0 1

D

2. 3667019E+05 0. 1917081348E-02 0 0 0 0 0 0 0 0 0 0 0 0 0 0 0 0  
 5. 4508363E+04 0. 1062880618E-01 0 0 0 0 0 0 0 0 0 0 0 0 0 0 0 0  
 1. 7089094E+04 0. 4958447204E-01 0 0 0 0 0 0 0 0 0 0 0 0 0 0 0 0  
 6. 3873362E+03 0. 2103238087E+00 0 0 0 0 0 0 0 0 0 0 0 0 0 0 0 0  
 2. 6994303E+03 0. 8154571425E+00 0 0 0 0 0 0 0 0 0 0 0 0 0 0 0 0  
 1. 2476450E+03 0 1 0 0 0 0 0 0 0 0 0 0 0 0 0 0 0 0 0 0  
 6. 1547151E+02 0 0 1 0 0 0 0 0 0 0 0 0 0 0 0 0 0 0 0 0  
 3. 1907207E+02 0 0 0 1 0 0 0 0 0 0 0 0 0 0 0 0 0 0 0 0  
 1. 7114987E+02 0 0 0 0 1 0 0 0 0 0 0 0 0 0 0 0 0 0 0 0  
 9. 4318316E+01 0 0 0 0 0 1 0 0 0 0 0 0 0 0 0 0 0 0 0 0  
 5. 2561572E+01 0 0 0 0 0 0 1 0 0 0 0 0 0 0 0 0 0 0 0 0  
 2. 9204773E+01 0 0 0 0 0 0 0 1 0 0 0 0 0 0 0 0 0 0 0 0  
 1. 6442916E+01 0 0 0 0 0 0 0 0 1 0 0 0 0 0 0 0 0 0 0 0  
 9. 1635830E+00 0 0 0 0 0 0 0 0 0 1 0 0 0 0 0 0 0 0 0 0  
 4. 9682649E+00 0 0 0 0 0 0 0 0 0 0 1 0 0 0 0 0 0 0 0 0  
 2. 6263205E+00 0 0 0 0 0 0 0 0 0 0 0 1 0 0 0 0 0 0 0 0  
 1. 2986248E+00 0 0 0 0 0 0 0 0 0 0 0 0 1 0 0 0 0 0 0 0



$$E_{CBS} = \frac{E_X X^3 - E_Y Y^3}{X^3 - Y^3}$$

with  $X, Y = 3, 4$ .

## LOBA

The formal oxidation states of Cn in CnFn (n = 1, 2, 4, and 6) were estimated by localized orbital bonding analysis (LOBA) at the spin-free X2C-AU/PBE0 level. In the orbital localization, some missing parameters of Cn were taken from Hg. The default threshold of 50% was taken for LOBA. The computed oxidation states are +n for Cn and -1 for F.

## Optimized Cartesian coordinates

### SOECP/PBE0

O<sub>2</sub>

|   |              |              |               |
|---|--------------|--------------|---------------|
| O | 0.0000000000 | 0.0000000000 | 0.5971657532  |
| O | 0.0000000000 | 0.0000000000 | -0.5971657532 |

F<sub>2</sub>

|   |              |              |               |
|---|--------------|--------------|---------------|
| F | 0.0000000000 | 0.0000000000 | 0.6864919594  |
| F | 0.0000000000 | 0.0000000000 | -0.6864919594 |

CnF

|    |              |              |               |
|----|--------------|--------------|---------------|
| Cn | 0.0000000000 | 0.0000000000 | -0.0362783766 |
| F  | 0.0000000000 | 0.0000000000 | 2.0716783766  |

CnF<sub>2</sub>

|    |              |              |               |
|----|--------------|--------------|---------------|
| Cn | 0.0000000000 | 0.0000000000 | 0.0000000000  |
| F  | 0.0000000000 | 0.0000000000 | 1.9257831739  |
| F  | 0.0000000000 | 0.0000000000 | -1.9257831739 |

CnF<sub>4</sub>

|    |               |               |              |
|----|---------------|---------------|--------------|
| Cn | 0.0000000000  | 0.0000000000  | 0.0000000000 |
| F  | 0.0000000000  | 1.9288437143  | 0.0000000000 |
| F  | 0.0000000000  | -1.9288437143 | 0.0000000000 |
| F  | 1.9288437143  | 0.0000000000  | 0.0000000000 |
| F  | -1.9288437143 | 0.0000000000  | 0.0000000000 |

CnF<sub>6</sub>

|    |               |               |               |
|----|---------------|---------------|---------------|
| Cn | 0.0000000000  | 0.0000000000  | 0.0000000000  |
| F  | 0.0000000000  | 0.0000000000  | 1.9324926753  |
| F  | 0.0000000000  | 0.0000000000  | -1.9324926753 |
| F  | 0.0000000000  | 1.9324926753  | 0.0000000000  |
| F  | 0.0000000000  | -1.9324926753 | 0.0000000000  |
| F  | 1.9324926753  | 0.0000000000  | 0.0000000000  |
| F  | -1.9324926753 | 0.0000000000  | 0.0000000000  |

CnO

|    |              |              |               |
|----|--------------|--------------|---------------|
| Cn | 0.0000000000 | 0.0000000000 | -0.0100346381 |
| O  | 0.0000000000 | 0.0000000000 | 1.8525346381  |

CnO<sub>2</sub>

|    |             |             |               |
|----|-------------|-------------|---------------|
| Cn | 0.000000000 | 0.000000000 | 0.000000000   |
| O  | 0.000000000 | 0.000000000 | 1.8298334709  |
| O  | 0.000000000 | 0.000000000 | -1.8298334709 |

CnO<sub>3</sub>

|    |               |               |             |
|----|---------------|---------------|-------------|
| Cn | 0.000000000   | 0.000000000   | 0.000000000 |
| O  | 0.000000000   | 1.8349244513  | 0.000000000 |
| O  | 1.5890973790  | -0.9174631615 | 0.000000000 |
| O  | -1.5890973790 | -0.9174631615 | 0.000000000 |

CnOF<sub>2</sub>

|    |             |               |               |
|----|-------------|---------------|---------------|
| Cn | 0.000000000 | 0.000000000   | 0.2526577871  |
| O  | 0.000000000 | 0.000000000   | -1.6975065666 |
| F  | 0.000000000 | 1.9299167556  | 0.3327750398  |
| F  | 0.000000000 | -1.9299167556 | 0.3327750398  |

CnO<sub>2</sub>F<sub>2</sub>

|    |             |               |               |
|----|-------------|---------------|---------------|
| Cn | 0.000000000 | 0.000000000   | -0.0913874709 |
| O  | 0.000000000 | 1.4101669664  | -1.2754198229 |
| O  | 0.000000000 | -1.4101669664 | -1.2754198229 |
| F  | 0.000000000 | 1.3004008893  | 1.3752169433  |
| F  | 0.000000000 | -1.3004008893 | 1.3752169433  |

**X2C-AU/PBEO**

F<sub>2</sub>

|   |            |            |             |
|---|------------|------------|-------------|
| F | 0.00000000 | 0.00000000 | -0.68795154 |
| F | 0.00000000 | 0.00000000 | 0.68795154  |

CnF

|    |            |            |            |
|----|------------|------------|------------|
| Cn | 0.00000000 | 0.00000000 | 0.00000000 |
| F  | 0.00000000 | 0.00000000 | 2.0692118  |

CnF<sub>2</sub>

|    |            |            |             |
|----|------------|------------|-------------|
| Cn | 0.00000000 | 0.00000000 | 0.00000000  |
| F  | 0.00000000 | 0.00000000 | 1.91964368  |
| F  | 0.00000000 | 0.00000000 | -1.91964368 |

CnF<sub>4</sub>

|    |            |             |            |
|----|------------|-------------|------------|
| Cn | 0.00000000 | 0.00000000  | 0.00000000 |
| F  | 1.92679331 | 0.00000000  | 0.00000000 |
| F  | 0.00000000 | -1.92679331 | 0.00000000 |

|   |             |            |            |
|---|-------------|------------|------------|
| F | -1.92679331 | 0.00000000 | 0.00000000 |
| F | 0.00000000  | 1.92679331 | 0.00000000 |

CnF<sub>6</sub>

|    |             |             |             |
|----|-------------|-------------|-------------|
| Cn | 0.00000000  | 0.00000000  | 0.00000000  |
| F  | 0.00000000  | 0.00000000  | 1.93250318  |
| F  | 1.93250318  | 0.00000000  | 0.00000000  |
| F  | 0.00000000  | -1.93250318 | 0.00000000  |
| F  | -1.93250318 | 0.00000000  | 0.00000000  |
| F  | 0.00000000  | 1.93250318  | 0.00000000  |
| F  | 0.00000000  | 0.00000000  | -1.93250318 |

CnF<sub>6</sub> (TS<sub>1</sub>)

|    |             |             |             |
|----|-------------|-------------|-------------|
| Cn | 0.00104621  | 0.17705208  | -0.01224303 |
| F  | 1.09187438  | -1.79489701 | 0.10678514  |
| F  | -1.03294280 | -1.83715977 | 0.09805537  |
| F  | -1.89733939 | 0.47488709  | -0.02748258 |
| F  | 1.88437439  | 0.55707801  | -0.03582623 |
| F  | -0.00338130 | 0.13549196  | -1.94047814 |
| F  | 0.00127897  | 0.30898164  | 1.91086286  |

CnF<sub>6</sub> (TS<sub>2</sub>)

|    |             |             |             |
|----|-------------|-------------|-------------|
| Cn | 0.00000000  | 0.00000000  | 0.00000000  |
| F  | 0.00000000  | 0.00000000  | 2.75118019  |
| F  | 1.92569808  | 0.00000000  | 0.00000000  |
| F  | 0.00000000  | -1.92569808 | 0.00000000  |
| F  | -1.92569808 | -0.00000000 | 0.00000000  |
| F  | -0.00000000 | 1.92569808  | 0.00000000  |
| F  | 0.00000000  | -0.00000000 | -2.75118019 |

SOECP/CCSD(T)

F<sub>2</sub>

|   |            |            |             |
|---|------------|------------|-------------|
| F | 0.00000000 | 0.00000000 | -0.70986737 |
| F | 0.00000000 | 0.00000000 | 0.70986737  |

CnF<sub>2</sub>

|    |            |            |             |
|----|------------|------------|-------------|
| Cn | 0.00000000 | 0.00000000 | 0.00000000  |
| F  | 0.00000000 | 0.00000000 | -1.95750382 |
| F  | 0.00000000 | 0.00000000 | 1.95750382  |

CnF<sub>4</sub>

|    |            |            |            |
|----|------------|------------|------------|
| Cn | 0.00000000 | 0.00000000 | 0.00000000 |
|----|------------|------------|------------|



|   |             |             |            |
|---|-------------|-------------|------------|
| F | 0.00000000  | 1.94797437  | 0.00000000 |
| F | 1.94797437  | 0.00000000  | 0.00000000 |
| F | 0.00000000  | -1.94797437 | 0.00000000 |
| F | -1.94797437 | 0.00000000  | 0.00000000 |

CnF<sub>6</sub>

|    |             |             |             |
|----|-------------|-------------|-------------|
| Cn | 0.00000000  | 0.00000000  | 0.00000000  |
| F  | 0.00000000  | 0.00000000  | 1.95137055  |
| F  | 0.00000000  | 1.95137055  | 0.00000000  |
| F  | 1.95137055  | 0.00000000  | 0.00000000  |
| F  | 0.00000000  | -1.95137055 | 0.00000000  |
| F  | -1.95137055 | 0.00000000  | 0.00000000  |
| F  | 0.00000000  | 0.00000000  | -1.95137055 |

### Harmonic vibrational frequencies at the X2C-AU/PBE0 level

| Species                                            | Symm.                             | ZPE<br>(kcal/mol) | Harmonic frequencies<br>(cm <sup>-1</sup> )                                                                                                                                                                                                             |
|----------------------------------------------------|-----------------------------------|-------------------|---------------------------------------------------------------------------------------------------------------------------------------------------------------------------------------------------------------------------------------------------------|
| F <sub>2</sub>                                     | D <sub>∞h</sub>                   | 1.57              | 1100 (σ <sub>g</sub> <sup>+</sup> )                                                                                                                                                                                                                     |
| <sup>285</sup> CnF <sub>6</sub> (TS <sub>1</sub> ) | C <sub>1</sub> (C <sub>2v</sub> ) | 6.79              | 380i, 67, 93, 170, 210, 220, 240, 244, 253, 259, 376,<br>615, 641, 669, 691                                                                                                                                                                             |
| <sup>285</sup> CnF <sub>6</sub> (TS <sub>2</sub> ) | D <sub>4h</sub>                   | 5.68              | 57i(a <sub>1g</sub> ), 23(e <sub>u</sub> ), 40(e <sub>g</sub> ), 57(a <sub>2u</sub> ), 167(b <sub>1g</sub> ), 212(b <sub>1u</sub> ),<br>242(a <sub>2u</sub> ), 248(e <sub>u</sub> ), 640(b <sub>2g</sub> ), 659(a <sub>1g</sub> ), 687(e <sub>u</sub> ) |

See Table 3 in the text about harmonic vibrational frequencies of <sup>285</sup>CnF, <sup>285</sup>CnF<sub>2</sub>, <sup>285</sup>CnF<sub>4</sub> and <sup>285</sup>CnF<sub>6</sub>.

## Effective contact densities of Cn in fluorides

The effective contact densities are computed at the optimized geometries by X2C-AU/PBE0, and a root-mean-square charge radius of 6.07 fm is used for the Cn nucleus. For sf-X2C-AU/CCSD(T), only valence electrons in Cn 6d7s and F 2s2p are correlated. The total density is given for the Cn atom and the density differences for molecules. Unit: bohr<sup>-3</sup>.

|                  | xf-X2C-AU/PBE0 | X2C-AU/PBE0 | sf-X2C-AU/CCSD(T) |
|------------------|----------------|-------------|-------------------|
| Cn               | 28657175       | 29879227    | 28999920          |
| CnF              | -124           | -34         | -144              |
| CnF <sub>2</sub> | -414           | -304        | -421              |
| CnF <sub>4</sub> | -760           | -604        | -753              |
| CnF <sub>6</sub> | -970           | -782        | -933              |
